# Supplementary material
Source: PubMed Central journal article supplement (PMC2603183)
Supplement: NIHMS67904-supplement-01.pdf [file NIHMS67904-supplement-01.pdf]

a

CHIR-AB1  
KIR2DL1-D1

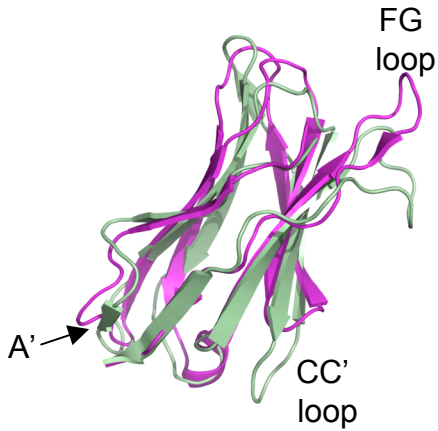

Rmsd = 2.5Å (92 C $\alpha$  atoms)  
Sequence identity = 33%

b

CHIR-AB1  
Fc $\alpha$ RI-D1

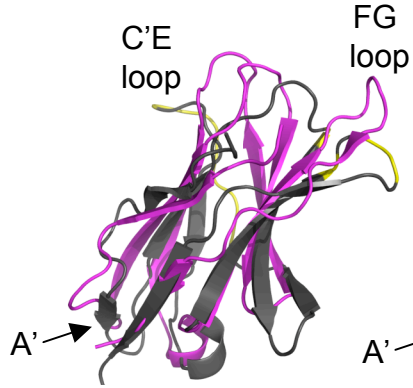

Rmsd = 2.7Å (85 C $\alpha$  atoms)  
Sequence identity = 28%

c

CHIR-AB1  
NKp46-D1

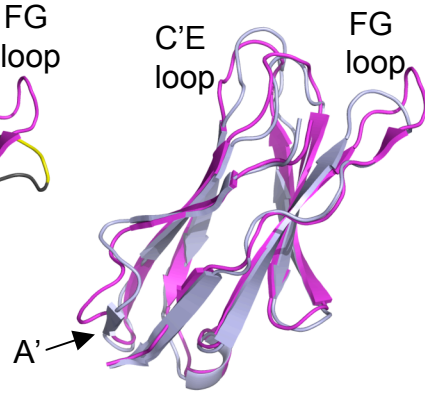

Rmsd = 1.4Å (91 C $\alpha$  atoms)  
Sequence identity = 30%

d

KIR2DL1-D1

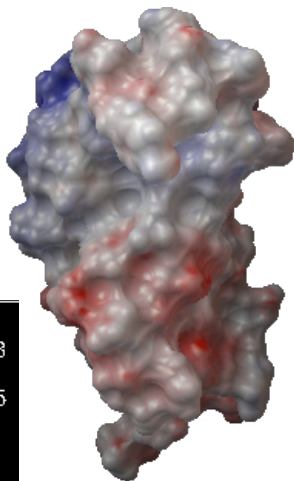

e

Fc $\alpha$ RI-D1

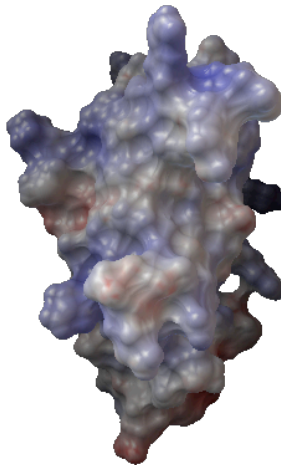

f

NKp46-D1

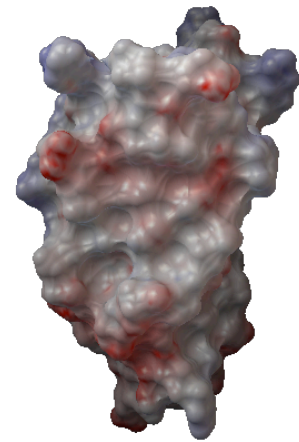

Supplementary Figure 1

### Supplementary Figure 1. CHIR-AB1 and related proteins

Ribbon diagram of CHIR-AB1 (*pink*) superimposed on the D1 domains of (a) KIR2DL1 (*light green*), (b) Fc $\alpha$ RI (*black*), (c) NKp46 (*light blue*). The regions involved in IgA binding in Fc $\alpha$ RI are highlighted in *yellow*. (d-f) Electrostatic potentials on CHIR-AB1 relatives in the region corresponding to the CHIR-AB1 dimerization interface. Electrostatic potential is plotted from  $-10.3$  kT/e (electronegative; *red*) to  $+10.3$  kT/e (electropositive; *blue*) with *white* indicating electroneutrality. Compare to the electrostatic potential surface of the CHIR-AB1 monomer shown in Figure 3c.
